1 **Title:** Placental DNA methylation signatures of maternal smoking during pregnancy  
2 and potential impacts on fetal growth

3

4 **Authors**

5 Todd M. Everson<sup>1,\*</sup>¥

6 Marta Vives-Usano<sup>2,3,4,\*</sup>

7 Emie Seyve<sup>5,\*</sup>

8 Andres Cardenas<sup>6,7</sup>

9 Marina Lacasaña<sup>4,8,9</sup>

10 Jeffrey M. Craig<sup>10,11,12</sup>

11 Corina Lesseur<sup>13</sup>

12 Emily R. Baker<sup>14</sup>

13 Nora Fernandez-Jimenez<sup>15,16,17</sup>

14 Barbara Heude<sup>18</sup>

15 Patrice Perron<sup>19</sup>

16 Beatriz González-Alzaga<sup>8,9</sup>

17 Jane Halliday<sup>20,11</sup>

18 Maya A. Deysenroth<sup>13</sup>

19 Margaret R. Karagas<sup>21</sup>

20 Carmen Íñiguez<sup>22,23,4</sup>

21 Luigi Bouchard<sup>24</sup>

22 Pedro Carmona-Sáez<sup>25</sup>

23 Yuk J. Loke<sup>10</sup>

24 Ke Hao<sup>26</sup>

25 Thalia Belmonte<sup>27</sup>

26 Marie A. Charles<sup>18</sup>

27 Jordi Martorell-Marugán<sup>25,28</sup>

28 Evelyne Muggli<sup>20,11</sup>

29 Jia Chen<sup>13</sup>

30 Mariana F. Fernández<sup>4,9,29</sup>

31 Jorg Tost<sup>30</sup>

32 Antonio Gómez-Martín<sup>31</sup>

33 Stephanie J. London<sup>32</sup>

34 Jordi Sunyer<sup>3,4,33,34</sup>

35 Carmen J. Marsit<sup>1,35,\*\*</sup>

36 Johanna Lepeule<sup>5,\*\*</sup>

37 Marie-France Hivert<sup>6,36,\*\*</sup>

38 Mariona Bustamante<sup>2,3,4,33,\*\*, ¥</sup>

39

40 \* *These authors contributed equally to this work*

41 \*\* *These authors contributed equally to this work*

42 ¥ *Corresponding authors*

43

44 **Correspondence**

45 Correspondence can be addressed to Todd M. Everson (Todd.M.Everson@Emory.edu)  
46 and Mariona Bustamante (mariona.bustamante@isglobal.org).

47

48 **Competing interests**

49 The authors declare no competing interests.

50

51 **Author Affiliations**

- 52 <sup>1</sup> Department of Environmental Health, Rollins School of Public Health at Emory  
53 University, Atlanta, GA, USA  
54 <sup>2</sup> Center for Genomic Regulation (CRG), Barcelona Institute of Science and  
55 Technology, Barcelona, Spain  
56 <sup>3</sup> Universitat Pompeu Fabra, Barcelona, Spain  
57 <sup>4</sup> CIBER Epidemiología y Salud Pública (CIBERESP), Madrid, Spain  
58 <sup>5</sup> University Grenoble Alpes, Inserm, CNRS, IAB, 38000 Grenoble, France  
59 <sup>6</sup> Department of Population Medicine, Harvard Medical School, Harvard Pilgrim Health  
60 Care Institute, Boston, MA, USA  
61 <sup>7</sup> Division of Environmental Health Sciences, School of Public Health, University of  
62 California, Berkeley, Berkeley, CA, USA  
63 <sup>8</sup> Andalusian School of Public Health, Granada, Spain  
64 <sup>9</sup> Instituto de Investigación Biosanitaria (ibs.GRANADA), Granada, Spain  
65 <sup>10</sup> Molecular Epidemiology, Murdoch Children's Research Institute, Parkville, Australia  
66 <sup>11</sup> Department of Paediatrics, University of Melbourne, Parkville, Australia  
67 <sup>12</sup> Centre for Molecular and Medical Research, Deakin University, Geelong, Australia  
68 <sup>13</sup> Department of Environmental Medicine and Public Health, Icahn School of Medicine  
69 at Mount Sinai, New York, NY, USA  
70 <sup>14</sup> Department of Obstetrics & Gynecology, Geisel School of Medicine at Dartmouth  
71 College, Lebanon, NH  
72 <sup>15</sup> University of the Basque Country (UPV/EHU), Leioa, Spain  
73 <sup>16</sup> Biocruces-Bizkaia Health Research Institute, Barakaldo, Spain  
74 <sup>17</sup> Public Health Division of Gipuzkoa, Basque Government, San Sebastian, Spain  
75 <sup>18</sup> Inserm U1153, Research Center for Epidemiology and Statistics (CRESS), Paris  
76 Descartes University, Villejuif, France  
77 <sup>19</sup> Department of Medicine, University of Sherbrooke, Sherbrooke, QC, Canada  
78 <sup>20</sup> Reproductive Epidemiology, Murdoch Children's Research Institute, Parkville,  
79 Australia  
80 <sup>21</sup> Department of Epidemiology, Geisel School of Medicine at Dartmouth College,  
81 Hanover NH, USA  
82 <sup>22</sup> Department of Statistics and Computational Research, Universitat de València,  
83 València, Spain  
84 <sup>23</sup> Epidemiology and Environmental Health Joint Research Unit, FISABIO-Universitat  
85 Jaume I-Universitat de València, València, Spain  
86 <sup>24</sup> Department of Biochemistry, University of Sherbrooke, Sherbrooke, QC, Canada  
87 <sup>25</sup> Bioinformatics Unit, GENYO, Centre for Genomics and Oncological Research,  
88 Pfizer, University of Granada, Andalusian Regional Government, Granada, Spain  
89 <sup>26</sup> Department of Genetics and Genomic Sciences, Icahn School of Medicine at Mount  
90 Sinai, New York, NY, USA  
91 <sup>27</sup> IUOPA University of Oviedo, Oviedo, Spain  
92 <sup>28</sup> Artys Health, Barcelona, Spain  
93 <sup>29</sup> Biomedical Research Centre (CIBM) and School of Medicine, University of Granada,  
94 Granada, Spain  
95 <sup>30</sup> Laboratory for Epigenetics and Environment, Centre National de Recherche en  
96 Génomique Humaine, CEA – Institut de Biologie François Jacob, Evry, France  
97 <sup>31</sup> Genomics Unit. GENYO. Centre for Genomics and Oncological Research, Pfizer,  
98 University of Granada, Andalusian Regional Government, Granada, Spain

99     <sup>32</sup> Division of Intramural Research, National Institute of Environmental Health  
100     Sciences, National Institutes of Health, Department of Health and Human Services,  
101     Durham, North Carolina, USA  
102     <sup>33</sup> ISGlobal, Barcelona Institute for Global Health, Barcelona, Spain  
103     <sup>34</sup> Hospital del Mar Medical Research Institute (IMIM), Barcelona, Spain  
104     <sup>35</sup> Department of Epidemiology, Rollins School of Public health at Emory University,  
105     Atlanta, GA, USA  
106     <sup>36</sup> Diabetes Unit, Massachusetts General Hospital, Boston, MA, USA  
107  
108

109 **Abstract**

110 Maternal smoking during pregnancy (MSDP) contributes to poor birth  
111 outcomes, in part through disrupted placental functions, which may be reflected in the  
112 placental epigenome. We meta-analyzed the associations between MSDP and placental  
113 DNA methylation (DNAm) and between DNAm and birth outcomes within the  
114 Pregnancy And Childhood Epigenetics (PACE) consortium (7 studies, N=1700, 344  
115 with any MSDP). We identified 1224 CpGs that were associated with MSDP, of which  
116 341 associated with birth outcomes and 141 associated with gene expression. Only 6 of  
117 these CpGs were consistent with the findings from a prior meta-analysis of cord blood  
118 DNAm, demonstrating substantial tissue-specific responses to MSDP. The placental  
119 MSDP associated CpGs were enriched for growth-factor signaling, hormone activity,  
120 inflammation, and vascularization, which play important roles in placental function. We  
121 demonstrate links between placental DNAm, MSDP and poor birth outcomes, which  
122 may better inform the mechanisms through which MSDP impacts placental function and  
123 fetal growth.

124

125 **Keywords:** DNA methylation, epigenetics, EWAS, pregnancy, smoking, birth weight,  
126 gestational age

127

128 Almost 1 in 10 pregnancies are impacted by the effects of maternal smoking during  
129 pregnancy (MSDP), with state-specific prevalence ranging from as low as 1.8% to as  
130 high as 27.1% in the USA<sup>1</sup>, while in Europe, the prevalence of MSDP is estimated to  
131 range between 4.2% and 18.9%<sup>2</sup>. Consequently, the numerous health effects of MSDP  
132 remain a significant public health concern. The impact of this exposure on fetal  
133 development has been the source of significant investigation, resulting in MSDP being  
134 recognized as a cause of multiple negative pregnancy and birth outcomes<sup>3</sup>.

135 The mechanisms that underlie this reproductive and developmental toxicity are  
136 partially understood and include molecular and anatomical changes of the placenta<sup>4,5</sup>.  
137 Additionally, experimental mouse models have recently highlighted the critical roles of  
138 proper placental function in ensuring successful pregnancy outcomes<sup>6</sup>. Epigenetic  
139 responses to prenatal exposures have emerged as potential intermediate links between  
140 early life exposures and developmental health outcomes, and epidemiologic studies of  
141 DNAm, particularly multi-cohort collaborative efforts, are powerful approaches to  
142 investigate these types of research questions<sup>7</sup>. So far, most studies of MSDP and  
143 epigenetics have focused on DNA methylation (DNAm) variations in cord blood,  
144 though some studies of placenta, peripheral blood and lung tissues have also been  
145 performed<sup>8</sup>. The Pregnancy and Childhood Epigenetics (PACE) consortium<sup>9</sup> published  
146 a large meta-analysis identifying thousands of MSDP-associated variations in DNAm  
147 within cord blood and child peripheral blood<sup>10</sup>. However, the placental epigenome has  
148 not been as thoroughly studied, though the placenta is likely a critical target organ of  
149 MSDP-associated toxicity. A handful of prior studies have examined the relationships  
150 between MSDP and (DNAm) in human placenta<sup>11-14</sup>, identifying MSDP-associated loci  
151 some of which have been suggested partially mediate the effects of MSDP on lower  
152 birth weight<sup>15</sup>.

153           These studies have begun to characterize the impact that MSDP has on the  
154 human placental epigenome but have been limited by small sample sizes and have not  
155 adjusted for placental tissue heterogeneity. We aimed to address these gaps by  
156 performing a fixed effects meta-analysis examining the relationships between MSDP  
157 and variations in the placental methylome across seven independent studies that are  
158 members of the PACE consortium. We also aimed to gain insights into the potential  
159 biological and health-related impacts of these associations by performing additional  
160 analyses with nearby mRNA expression, as well as functional, regulatory, and  
161 phenotypic enrichment, and a secondary meta-analysis of the associations between  
162 placental DNAm and birth outcomes. This study represents the largest and most  
163 comprehensive examination of MSDP associations with placental DNAm in human  
164 populations and provides novel insights into the placental molecular responses to MSDP  
165 and how these relate to fetal development.  
166

167 **Results**

168 *Study population*

169 Seven American, Australian, and European studies (N=1,700) contributed to the  
170 epigenome-wide association study (EWAS) linking MSDP to placental DNAm:  
171 including Asking Questions about Alcohol in pregnancy (AQUA)<sup>16</sup>, Study on the pre-  
172 and early postnatal determinants of child health and development (EDEN)<sup>17</sup>, Genetics of  
173 Glucose regulation in Gestation and Growth (Gen3G)<sup>18</sup>, Genetics, Early Life  
174 Environmental Exposures and Infant Development in Andalusia (GENEIDA),  
175 Environment and Childhood Project (INMA)<sup>19</sup>, New Hampshire Birth Cohort Study  
176 (NHBCS)<sup>20</sup> and Rhode Island Child Health Study (RICHS)<sup>21</sup>. For this meta-analysis,  
177 344 (20.2%) mothers reported any MSDP, defined as any cigarette smoking during any  
178 trimester of pregnancy. Any MSDP tended to be less prevalent in the cohorts from  
179 Canada and the USA compared to those from Australia and Europe (Table 1). Three  
180 cohorts (N=795, EDEN, GENEIDA and INMA) contributed to the EWAS of sustained  
181 MSDP, defined as maternal smoking throughout pregnancy, among which 163 (20.5%)  
182 mothers reported sustained MSDP. Distributions of covariates by cohort are provided in  
183 the supplementary materials (Excel Table S1).

184 *Genome-wide DNAm meta-analyses*

185 We produced four statistical models for each CpG site, modeling the  
186 associations between DNAm with both any and sustained MSDP, with and without  
187 adjustment for putative cellular heterogeneity which was estimated with a reference free  
188 deconvolution algorithm<sup>22</sup>. Models were adjusted for maternal age, parity, and maternal  
189 education. Genomic inflation factors from the meta-analyses ranged from  $\lambda=2.0$  to 2.8  
190 (Excel Table S2, Supplemental Figure S1). Any MSDP was associated with DNAm at  
191 532 CpG sites after Bonferroni adjustment (Excel Table S3), while sustained MSDP

192 was associated with DNAm at 568 CpG sites (Excel Table S4). After adjusting for  
193 putative cellular heterogeneity, any MSDP was associated with 878 CpGs (Excel Table  
194 S5), while sustained MSDP was associated with 894 CpGs (Excel Table S6). Among  
195 these, 10.7% of models for any MSDP and 3.9% of models for sustained MSDP, not  
196 adjusted for cell type, yielded heterogeneity p-values  $< 0.01$ , while only 5.5% of the  
197 models for any MSDP and 3.5% for sustained MSDP, adjusted for putative cellular  
198 heterogeneity, produced heterogeneity p-values  $< 0.01$ . Thus, heterogeneity in the  
199 associations across cohorts was lowest in the analyses that were adjusted for putative  
200 cellular heterogeneity and the CpGs from these models that yielded Bonferroni-  
201 significant associations (1224 unique CpGs) were carried forward for secondary  
202 analyses.

203 Overall, the Bonferroni significant CpGs were distributed throughout the  
204 genome, and the majority (68%) of CpGs exhibited lower DNAm in association with  
205 any and sustained MSDP (Figure 1). Of the 548 CpGs that yielded Bonferroni  
206 significant associations with both any and sustained MSDP, the absolute values of the  
207 parameter estimates were greater for the models of sustained MSDP compared to the  
208 estimates for any MSDP (Excel Table S7). In a secondary analysis that restricted the  
209 any MSDP models to the same three cohorts that contributed to the sustained MSDP  
210 models (EDEN, GENEIDA, and INMA), we again found that almost all CpGs (544 out  
211 of 548) exhibited increased magnitudes of association with increased duration of  
212 exposure (Excel Table S7, Supplemental Figure S2).

213 The most notable association was observed at cg27402634, located upstream of  
214 the *LEKRI* gene and the non-coding RNA *LINC00886*, which showed the largest  
215 differential DNAm and smallest p-values in all meta-analyses. Placentas that were  
216 exposed to any MSDP had 22.95% lower DNAm (95% CI: 21.01-24.99% lower



217 DNAm; p-value = 5.35E-119) and those exposed to sustained MSDP had 25.78% lower  
218 DNAm (95% CI: 24.02-27.54% lower DNAm; p-value = 7.22E-181) when compared to  
219 mothers that did not smoke at all during pregnancy. Though all cohorts observed  
220 substantial hypomethylation with MSDP at this CpG, the actual estimates of the  
221 associations were highly variable between cohorts for models of any MSDP  
222 (heterogeneity p-value = 2.66E-15), but relatively consistent for models of sustained  
223 MSDP (heterogeneity p-value = 1.55E-01) (Figure 2A). Overall, we consistency in the  
224 associations across cohorts for the vast majority of the 1224 CpGs that yielded  
225 Bonferroni-significant associations via meta-analysis: 92% and 97% of these CpGs  
226 yielded heterogeneity p-values > 0.01, for their associations with any and sustained  
227 MSDP respectively. In addition to cg27402634, we highlight those relationships that  
228 yielded that largest magnitudes of association: ( $|\beta_{\text{Any MSDP}}|$ ) > 0.05 for cg26843110  
229 (*EDC3*), cg20340720 (*WBP1L*), and cg17823829 (*KDM5B*) (Figure 2B-2D). We  
230 identified numerous other noteworthy relationships but due to the large number of  
231 Bonferroni-significant associations from our meta-analyses, we highlight the  
232 relationship among the 20 most statistically significant CpGs from the primary meta-  
233 analysis of any MSDP going forward (Table 2).

#### 234 ***Expression Quantitative trait methylation (eQTM) analyses***

235 We tested whether the DNAm levels at MSDP-associated CpGs were associated  
236 with the expression of nearby ( $\pm$  250kb of the CpG) mRNA from 194 placental samples  
237 in the RICHS cohort, and corrected for multiple testing with the less conservative false  
238 discovery rate (FDR) due to the smaller sample size. We identified 170 associations  
239 between DNAm and gene expression within a 5% FDR (Excel Table S8), including 141  
240 unique CpGs and 140 unique mRNAs; 72.4% of the eQTMs exhibited inverse  
241 associations, while inverse associations were most common and statistical significance

242 was strongest for CpGs that were closer to the transcription start site (Supplemental  
243 Figure S3). Among the top 20 CpGs from our meta-analysis, eight were identified as  
244 eQTM (5% FDR) (Table 3). Higher placental DNAm at cg27402634, was associated  
245 with lower expression ( $\beta = -2.32$ , and FDR < 5%) of *LEKRI*. Additionally, DNAm at  
246 cg17823829 (annotated to *KDM5B*) was most strongly associated lower expression of  
247 *PPFIA4* (FDR < 5%), and DNAm at cg26843110 (annotated to *EDC3*) was nominally  
248 associated with higher expression of *CSK*, while cg20340720 (annotated to *WBPIL*)  
249 was not associated with any nearby mRNA expression.

### 250 ***Functional and regulatory enrichment analyses***

251 Enrichment analyses were performed to gain insights into which biological  
252 processes may be impacted by these MSDP-associated CpGs. We performed gene-set  
253 enrichment analyses, which included 565 genes annotated to CpGs associated with any  
254 MSDP and 581 genes for sustained MSDP. 143 and 25 pathways were significantly (q-  
255 value < 0.05) enriched among CpGs associated with any MSDP (Excel Table S9) and  
256 sustained MSDP (Excel Table S10), respectively. In both gene-sets, “signaling by nerve  
257 growth factor (NGF)” was the most significant pathway (q-value = 2E-04 for any  
258 MSDP and q-value = 9.6E-03 for sustained MSDP). Other significantly enriched  
259 pathways were related to growth factors (VEGF, EGF, PDGF, IGF1R), hormones  
260 (aldosterone, insulin, TSH, GnRH), interleukins (IL2, IL4, IL7), myometrial  
261 contraction, vascular smooth muscle contraction, thrombin and platelet activation,  
262 signaling and aggregation. We also tested whether the genes annotated to MSDP-  
263 associated CpGs were enriched for regulatory regions of specific transcription factors  
264 (TFs). Most notably, our MSDP-associated CpGs were enriched for genes regulated by  
265 GATA1 and GATA2, as well as by RUNX1, TP63, SMAD4, AR, TP53 or PPARG  
266 (Excel Tables S11-S12).

267 We then examined whether the MSDP-associated CpG sites were enriched for  
268 CpG island locations, allele-specific germline differentially methylated regions  
269 (gDMR)<sup>23</sup>, regulatory features from the placenta specific 15-chromatin state annotation  
270 from ROADMAP<sup>24</sup>, or placenta specific partially methylated domains (PMD)<sup>25</sup>, which  
271 contain placenta-specific repressed genes (annotated to the results files in  
272 Supplementary Tables S3-S6). The MSDP-associated CpGs were depleted in PMDs  
273 (Supplemental Figure S4), highly enriched in placenta enhancers and depleted in  
274 transcription start sites and inactive states (Supplemental Figure S5). Additionally,  
275 MSDP-associated CpGs were depleted in CpG islands and shores, while enriched in  
276 CpG island shelves and open sea positions (Supplemental Figure S6). We identified 3  
277 CpGs (cg05211790 and cg16360861 at *RAI14*, and cg05575921 at *AHRR* gene) that  
278 were within two candidate maternal gDMRs, but our overall set of MSDP-associated  
279 CpGs were neither depleted nor enriched for confirmed gDMRs (Supplemental Figure  
280 S7).

### 281 ***Phenotype enrichment analyses***

282 The genes annotated to our MSDP-associated CpGs were tested for phenotype  
283 enrichment using data from the database of Genotypes and Phenotypes (dbGAP). Our  
284 MSDP-associated genes were enriched for numerous phenotypes in dbGAP, including  
285 several adiposity phenotypes (body mass index (BMI), waist-hip ratio, and obesity),  
286 blood pressure, cardiovascular diseases, type 2 diabetes, asthma and respiratory function  
287 (Excel Tables S13-S14).

### 288 ***Proximity to genetic variants for birth outcomes***

289 We aimed to understand whether the MSDP-associated CpGs that we identified  
290 co-localize within the same genomic regions as genetic variants that have been  
291 associated with birth outcomes via genome-wide association studies (GWAS). Thus we

292 investigated whether MSDP-associated CpGs were within  $\pm 0.5$  Mb (1 Mb window) of  
293 single nucleotide polymorphisms (SNPs) that have been associated with birth weight  
294 (BW), birth length (BL), head circumference (HC) and gestational age (GA)<sup>26-31</sup>, which  
295 have been added as annotations to the meta-analysis results files (Excel Tables S3-S6).  
296 Of the 324 birth outcome SNPs in autosomal chromosomes, 94 SNPs (83 loci) and 108  
297 (97 loci) were within 0.5 Mb of CpGs that were associated with any or sustained  
298 MSDP, respectively (Excel Tables S15). Overall ~16% of the 1224 MSDP-associated  
299 CpG sites were within 0.5 Mb of birth outcome SNPs, including cg27402634 (*LEKRI*),  
300 cg26843110 (*EDC3*) and cg20340720 (*WBPIL*). We also explored whether our MSDP-  
301 associated CpGs may be biased by methylation quantitative trait loci (mQTLs), in  
302 which SNPs influence the methylation levels at nearby CpGs. Two studies have  
303 examined this question in human placenta, identifying 866<sup>32</sup> and 4,342<sup>33</sup> placental  
304 mQTLs. Our findings did not appear to be biased by genetic variation as only 9 of the  
305 1,224 MSDP-associated CpGs are previously characterized placental mQTLs.

### 306 ***Association of DNAM at smoking associated loci and smoking related birth outcomes***

307 We also performed a second meta-analysis to examine the relationships between  
308 DNAM with gestational age at birth, preterm birth, BW, BL, and HC z-scores, outcomes  
309 that are known to be related to maternal smoking. Of the 1224 CpGs tested, 341  
310 (27.9%) were related to at least one birth outcome after Bonferroni-adjustment  
311 (0.05/1224). The majority of birth outcome associations were related to gestational age  
312 at birth (298 CpGs) (Excel Table S16). Preterm delivery, for which only two cohorts  
313 could contribute data (EDEN and NHBCS), produced similar associations found for  
314 GA, though fewer CpGs were statistically significant (Excel Table S17). We also found  
315 that numerous loci were associated birth size z-scores, with the majority of these being  
316 associated with BW (43 CpGs) (Excel Table S18), followed by BL (20 CpGs) (Excel

317 Table S19) and HC (4 CpGs) (Excel Table S20). Some of the CpGs associated with GA  
318 were also associated with birth size measurements, even though they were standardized  
319 for GA, suggesting independent associations with both gestational duration and fetal  
320 growth (Supplemental Figure S8A), including 6 CpGs (annotated to *SYNJ2*, *PXN*,  
321 *PTPRE*, *IGF2BP2*, 4q21.1) shared between GA and BW, and 2 (annotated to *POLR3E*  
322 and *LOC441869*) shared between GA and BL. Among the CpGs that yielded at least  
323 one Bonferroni-significant association with birth outcomes, CpGs that tended to have  
324 positive associations with birth outcomes clustered together and were typically  
325 hypomethylated with MSDP, while CpGs that exhibited inverse associations with birth  
326 outcomes tended to be hypermethylated with exposure to MSDP (Supplemental Figure  
327 S8B).

328         Among our top 20 CpGs that were associated with any MSDP, 5 were associated  
329 with GA at birth and 4 were associated with BW z-scores after Bonferroni adjustment  
330 (Table 3). DNAm at cg27402634 (*LEKRI*) and cg20340720 (*WBPIL*), both located  
331 close to BW-SNPs and for which MSDP associated with lower DNAm, were associated  
332 with larger BW (p-value = 6.71E-07, and p-value = 2.42E-07). On the other hand,  
333 DNAm at cg26843110 (*EDC3*; hypomethylated in response to MDSP and also close to  
334 BW-SNPs) and at cg17823829 (*KDM5B*; hypermethylated) were associated with longer  
335 and shorter gestational ages at birth, respectively (p-value = 5.09E-12, and p-value =  
336 9.12E-06). Forest plots of BW z-scores and GA for these four CpGs are shown in  
337 Figure 3.

338         We summarize the results for all secondary analyses with a circos plot, for those  
339 548 CpGs that yielded Bonferroni significant associations with both any and sustained  
340 MSDP (Figure 4). Among these, 21 CpGs were associated both with mRNA expression

341 (FDR < 5%) and at least one birth outcome (Bonferroni-significant), which have been  
342 annotated with the gene symbols from their respective eQTM models.

### 343 ***Comparison with smoking-sensitive CpGs in cord blood***

344 We assessed whether the DNAm signatures of MSDP in the placenta were  
345 consistent with MSDP associations in cord blood previously reported by the PACE  
346 consortium<sup>10</sup>. Only nine CpGs annotated to seven unique genes (*AHRR*, *CYP1A1*,  
347 *GNG12*, *PXN*, *RNF122*, *SLC23A2*, and *ZBTB4*) yielded Bonferroni-significant  
348 associations in both tissues, out of 1224 CpGs from our study and 568 CpGs from the  
349 cord blood study (Table 4). Of note, the CpGs within *CYP1A1* and *RNF122* showed  
350 opposite directions of association with MSDP in cord blood and placenta. We also  
351 compared the parameter estimates from our study that yielded associations with MSDP  
352 within 5% FDR to the parameter estimates of those CpGs described in cord blood also  
353 within a 5% FDR<sup>10</sup>. There was no overall correlation ( $r^2 < 0.1$ ) of the regression  
354 coefficients across these two tissues (Supplemental Figure S9).

355

356 **Discussion**

357 We identified 1224 CpG sites with placental methylation levels that were  
358 associated with any or sustained MSDP. Differential DNAm was greater with increased  
359 duration of exposure at all loci that were associated with both any and sustained MSDP,  
360 and a large proportion of the MSDP-associated CpGs were related to birth outcomes.  
361 Those CpGs that were observed to have higher DNAm associated with MSDP, tended  
362 to be inversely associated with gestational age and birth size, while CpGs exhibiting  
363 lower DNAm with MSDP tended to be positively associated with gestational age and  
364 birth size.

365 The MSDP-associated loci with the most statistically significant association  
366 (cg27402634), also identified in prior smoking EWAS of placental tissues<sup>15</sup>, yielded  
367 dramatically lower DNAm levels in association with MSDP exposure. This effect-size  
368 is much larger in magnitude (~25% difference for sustained MSDP) compared to what  
369 has generally been observed in most exposure-focused EWAS, though within the same  
370 range as a CpG site in *AHRR* (cg05575921; 18% difference between exposed and  
371 unexposed) from a prior EWAS of current smoking and blood DNAm<sup>34</sup>. Additionally,  
372 decreased placental DNAm at cg27402634 correlates with increased expression of  
373 *LEKRI*, and associates with smaller BW and BL. Thus MSDP-associated  
374 hypomethylation at this CpG would be consistent with the well-known effect of  
375 maternal smoking resulting in shorter gestation and smaller birth size.

376 The functional activities of cg27402634, or corresponding *LEKRI* gene, in  
377 human placental tissues are not known. However, GWAS findings provide evidence  
378 that genetic variants within this region might be involved in fetal growth and possibly  
379 metabolic programming. For instance, the SNP rs1482852 or its proxies (rs900400;  
380 rs13322435) have been associated with different parameters of fetal growth<sup>35</sup>, adiposity

381 in newborns<sup>36,37</sup>, maternal adiponectin levels, cord blood leptin<sup>37</sup>, and insulin release  
382 after an oral glucose challenge<sup>38</sup>. These findings from genetic studies in combination  
383 with our current study, implicate that this locus on chromosome 3 (3q25.31) contains  
384 very active determinants of growth regulation and metabolic activity, and that placental  
385 DNAm at cg27402634 is highly responsive to maternal smoking. Future mechanistic  
386 work is necessary to investigate whether the placental epigenetic regulation at this locus  
387 specifically influences placental functions and/or overall growth and metabolic  
388 functions of the developing fetus.

389 We identified numerous other notable MSDP-associated loci in addition to those  
390 of cg27402634 (*LEKRI*), and highlight those CpGs yielding the strongest magnitudes of  
391 effect (cg20340720, cg26843110, and cg17823829). MSDP was associated with lower  
392 DNAm at cg20340720, located within *WBPIL* (also annotated as *C10orf26*), while  
393 lower DNAm at this CpG correlated with lower with BW and BL z-scores. Genetic  
394 variants nearby to this CpG have been related to BW<sup>31</sup> and blood pressure<sup>39</sup>. We also  
395 observed lower DNAm with MSDP at cg26843110, which is within the body of the  
396 *EDC3* gene, and is nearby to SNPs associated with BW (rs3784789<sup>31</sup>). Lower DNAm at  
397 cg26843110 associated with shorter GA at birth, and decreased expression of *CSK*,  
398 which is involved in trophoblast differentiation<sup>40</sup> as well as blood pressure and  
399 aldosterone regulation<sup>41</sup>. Finally, cg17823829 (annotated to *KDM5B*) was  
400 hypermethylated with MSDP. Higher DNAm at this CpG correlated with shorter GA at  
401 birth and with lower expression of *PPFIA4* gene, which can be induced in response to  
402 hypoxia<sup>42</sup>.

403 Our enrichment analyses identified numerous pathways that are critical to  
404 placental growth and development, such as vascularization, hormone signaling and  
405 inflammatory cytokines. Multiple pathways involving vascular endothelial growth



406 factors (VEGF) and nerve growth factors (NGF) populated the top of our enrichment  
407 lists. The VEGFs and their receptors are required for all steps of placental  
408 vascularization<sup>43</sup>, while nerve growth factor (NGF) modulates immune activity,  
409 inflammation and angiogenesis in the placenta<sup>44</sup>. Thus, our findings may be related to  
410 perturbed placental vascularization or angiogenic signaling. Altered placental  
411 vasculature is the most common placental pathology identified in pregnancy  
412 complications<sup>43</sup>, and MSDP can result in placental vascular remodeling<sup>5</sup>. Our findings  
413 may represent, in part, an epigenetic footprint of the placental vascular and angiogenic  
414 response to MSDP. Our CpGs were also enriched for genes regulated by specific  
415 transcription factors, most notably GATA1 and GATA2. Together with PPARG and  
416 TP63, GATA factors are part of the core transcriptional regulatory circuit that guides  
417 and maintains proper trophoblast differentiation<sup>45,46</sup>. Placentas lacking *PPARG* have  
418 lethal defects in placental vascularisation<sup>43</sup>, and angiogenic activity is reduced in  
419 placentas lacking *GATA2*<sup>47</sup>. Additionally, our MSDP-associated CpGs were enriched in  
420 placental enhancers, while depleted in transcription start sites, inactive states, PMDs<sup>25</sup>  
421 and gDMRs<sup>23</sup>, overall suggesting that the CpG sites that we identified are located in  
422 active regulatory regions.

423 Genes that are annotated to the CpGs that we studied have been linked to human  
424 health and disease traits via dbGAP, including a number of conditions that are part of  
425 the metabolic syndrome (BMI, obesity, cholesterol, blood pressure), for which prior  
426 links to MSDP have been reported<sup>48,49</sup>. This may indicate that the placental genes whose  
427 regulation is impacted by MSDP, are involved in energy uptake and expenditure, lipid  
428 and glucose metabolism, blood pressure regulation, and inflammation, which are some  
429 of the key physiological processes that are disrupted in the pathogenesis of metabolic  
430 syndrome<sup>50</sup>. The MSDP-associated CpGs were also enriched for genes linked to asthma

431 and impaired respiratory function, which are known to be caused by MSDP<sup>51</sup>, but it is  
432 unclear if altered regulation of these genes in the placenta has consequences on the  
433 development of the respiratory system. Furthermore, 128 of the 324 SNPs that have  
434 previously been associated with birth size or gestational age at birth<sup>26-31</sup> were in similar  
435 genomic proximity (within 0.5 Mb) to our CpGs, suggesting the MSDP-associated  
436 differential methylation in the placenta occurs in regions of the genome that are heavily  
437 involved in growth and development. Many of these SNPs have been shown to be  
438 related to birth outcomes, glycemic traits, blood pressure, and height, while the largest  
439 GWAS of BW to date concludes that the link between lower BW and later cardio-  
440 metabolic traits are largely driven by shared genetic effects<sup>31</sup>. Future research is needed  
441 to characterize this convergence of genetic effects on growth and placental epigenetic  
442 responsiveness to MSDP within similar genomic proximities. It is possible that MSDP,  
443 genetic variation, and placental DNAm in these regions yield additive or interactive  
444 effects on birth outcomes; prior studies have addressed this question in blood<sup>52,53</sup>.  
445 Additionally, while our MSDP-associated CpGs are in similar genomic regions (1 Mb  
446 windows) with birth outcome SNPs, very few of our CpGs (9 of 1224) and very few of  
447 the birth outcome SNPs (3 of 324) are known placental mQTLs<sup>32,33</sup>.

448 We compared our findings to those of a previous PACE meta-analysis of MSDP  
449 and cord blood DNAm<sup>10</sup>. Two of the CpGs that we identified within the *AHRR* gene  
450 (cg05575921 an eQTM for *AHRR* in placenta, and cg21161138), have been consistently  
451 observed to be sensors of MSDP exposure in cord blood. Only four other CpG sites,  
452 (annotated to *GNG12*, *PXN*, *ZBTB4*, and *SLC23A2*) were differentially methylated in  
453 both placenta and cord blood with the same direction of association in both tissues.  
454 Additionally, three CpG sites within *CYP1A1* and *RNF122* were identified in both meta-  
455 analyses but with different directions of association in cord blood versus placenta.

456 Interestingly, we observed *CYP11A1* to be hypomethylated in placenta with exposure to  
457 MSDP, which is consistent with studies of adipose, skin, and lung tissues<sup>54</sup>, but this  
458 CpG was hypermethylated in the cord blood meta-analysis<sup>10</sup>. Additionally, the most  
459 statistically significant association with MSDP in placenta (cg27402634, *LEKRI*) was  
460 not associated with MSDP in the cord blood meta-analysis. These observations, and the  
461 lack of overall correlation in regression coefficients when comparing placental and cord  
462 blood responses to MSDP, suggest that there are unique tissue-specific molecular  
463 responses to this exposure.

464 The above findings should be interpreted within the context this study's  
465 limitations. MSDP was self-reported and subject to misclassification, though differential  
466 misclassification likely would have biased our findings towards the null. We modeled  
467 two different definitions for MSDP and found that the models with sustained MSDP  
468 produced larger magnitudes of association, as has been previously found in studies of  
469 blood DNAm<sup>55</sup>. Although these findings suggest that increased duration of MSDP is  
470 associated with greater differential DNAm, we did not assess dose-response patterns (ie.  
471 number of cigarettes or cotinine concentrations), which should be the focus of future  
472 investigations. Our study predominantly consisted of samples from mother-infant pairs  
473 of European ancestry, and thus additional studies involving diverse racial and ethnic  
474 backgrounds are needed in order to improve the generalizability of these findings.  
475 While it is unlikely that placental DNAm would influence maternal smoking, the  
476 observed associations between DNAm levels and reproductive outcomes could be due  
477 to reverse causation. Placenta is a heterogeneous tissue with multiple different cell  
478 types<sup>56</sup> that serve different functions and thus have different epigenetic states<sup>57</sup>. To  
479 correct for this, we estimated and adjusted for variability in placental DNAm that may  
480 be due to tissue heterogeneity. We utilized a data driven approach that was not based on

481 a methylome reference, as no references for placental cell-type methylomes are  
482 currently available. Adjustments for these estimates of putative cellular admixtures did  
483 reduce heterogeneity in the meta-analyses, thus improving the consistency of observed  
484 associations between MSDP and DNAm across these independent cohorts. However, it  
485 is possible that residual confounding may have influenced some of our results.

486 Despite these limitations, our study had numerous strengths, including a large  
487 overall sample-size and seven independent studies to identify these relationships. We  
488 used harmonized definitions of exposure variables and covariates, standardized  
489 protocols for quality control and pre-processing of DNAm data, and standardized  
490 methods for estimating/adjusting for tissue heterogeneity and for statistical analyses.  
491 We also performed secondary analyses involving mRNA expression, functional and  
492 phenotype enrichment, overlap with GWAS hits for reproductive outcomes, and meta-  
493 analyses of DNAm variation with birth outcomes to provide biological and health-  
494 related interpretations of our findings.

495 We identified a DNAm signature of MSDP in the placenta that shows substantial  
496 differences from that observed in cord blood, most notably the CpG in close proximity  
497 to *LEKRI*. Many of the identified MSDP-associated loci are involved in biological  
498 process that are known to play critical roles in placental development, including  
499 vascularization, angiogenesis, and inflammation. Additionally, a large proportion of the  
500 MSDP-associated CpGs were also associated with GA at birth, or birth size z-scores,  
501 suggesting these placental epigenetic variations may be intermediate molecular markers  
502 between MSDP and these outcomes. Further study is required to determine whether  
503 these epigenetic variations are causal mediators within these relationships or reflecting  
504 other processes.

505



## 507 **Material and methods**

### 508 *Participating cohorts*

509 Cohorts that are members of the PACE consortium were identified for  
510 participation in the current study if they had existing DNAm data quantified from  
511 placental tissue via the Illumina Infinium HumanMethylation450 BeadChip and if they  
512 had obtained information on self-reported smoking during pregnancy. The seven  
513 cohorts that contributed to the meta-analysis of any MSDP included AQUA<sup>16</sup>, EDEN<sup>17</sup>,  
514 Gen3G<sup>18</sup>, GENEIDA, INMA<sup>19</sup>, NHBCS<sup>20</sup> and RICHS<sup>21</sup>. EDEN, GENEIDA and INMA  
515 also contributed to the sustained MSDP stratified analyses. RICHS contributed RNAseq  
516 data for analyses with mRNA expression. All cohorts acquired ethics approval and  
517 informed consent from participants prior to data collection through local ethics  
518 committees. Exclusion criteria for this study were: non-singleton births, pre-eclampsia  
519 and DNAm not assessed in the fetal side of the placenta. All participants in the study  
520 were of European ancestry, except 1.85% of EDEN mothers. Detailed methods for each  
521 cohort are provided in the Supplementary Material (Supplemental Methods File).

### 522 *Tobacco smoking definitions*

523 Any MSDP was defined as “yes” if mothers reported smoking cigarettes at any  
524 time during pregnancy. Sustained MSDP was defined as “yes” when mothers reported  
525 smoking cigarettes at least in the 1<sup>st</sup> and 3<sup>rd</sup> trimester of pregnancy. For both exposure  
526 variables, the comparison group was defined as the mothers that reported no smoking  
527 during any of the pregnancy.

### 528 *Placental genome-wide DNAm data acquisition, quality control and normalization*

529 Placental DNAm from the fetal side was assessed with the Infinium Human-  
530 Methylation450 array (Illumina, San Diego, CA USA). See Supplementary Methods file  
531 for extra details on placenta collection, DNA extraction and DNAm acquisition in each

532 cohort. Quality control of DNAm was standardized across all cohorts. Low quality  
533 samples were filtered out and probes with detection p-values  $> 0.01$  were excluded.  
534 Beta-values were normalized via functional normalization<sup>58</sup> and beta-mixture quantile  
535 normalization (BMIQ)<sup>59</sup> was applied to correct for the probe type bias. Cohorts applied  
536 ComBat to remove batch effects when applicable. Probes that hybridize to the X/Y  
537 chromosomes, cross-hybridizing probes and probes with SNPs at the CpG site,  
538 extension site, or within 10 bp of the extension site with an average minor allele  
539 frequency  $> 0.01$  were filtered out<sup>60</sup>. Overall, 418,639 probes and 415,396 were  
540 available for modelling any MSDP and sustained MSDP, respectively. Finally, DNAm  
541 extreme outliers ( $<25^{\text{th}}$  percentile  $- 3*\text{IQR}$  or  $>75^{\text{th}}$  percentile  $+ 3*\text{IQR}$  across all the  
542 samples) were trimmed.

#### 543 *Estimates of putative cellular heterogeneity*

544 Placental putative cellular heterogeneity was estimated from DNAm data using a  
545 reference-free cell-mixture decomposition method<sup>61</sup>. The number of surrogate variables  
546 ranged from 2 to 5 depending on the cohort. Models for differential DNAm were  
547 corrected for the number of surrogate variables minus one to reduce multi-collinearity.

#### 548 *Genome-wide differential DNAM analyses*

549 Within each cohort, robust linear regression from the “MASS” package<sup>62</sup> in R  
550 were used to account for potential heteroskedasticity while testing the associations  
551 between normalized DNAm beta values at each CpG with any MSDP and sustained  
552 MSDP. Models were adjusted for maternal age, parity, maternal education and cohort-  
553 specific variables first unadjusted for putative cellular heterogeneity then adjusted for  
554 cellular heterogeneity. We performed inverse variance-weighted fixed-effects meta-  
555 analyses using METAL<sup>63</sup>. The meta-analysis was performed independently by two  
556 groups to ensure consistent results. CpGs not retained in at least 2 cohorts were filtered

557 out. We used the Bonferroni adjustment to control for multiple testing. To examine  
558 whether increased duration of exposure (sustained smoking versus any smoking)  
559 yielded increased magnitudes of association, we calculated the percent change in the  
560 coefficients between the two models ( $|\beta_{\text{Sustained}}| - |\beta_{\text{Any}}|/|\beta_{\text{Any}}| * 100$ ). Secondary analyses  
561 were only performed on CpGs that yielded Bonferroni significant associations with any  
562 or sustained MSDP in models that were adjusted for putative cellular heterogeneity.

### 563 *Expression quantitative trait methylation (eQTM) loci*

564 We performed expression quantitative trait methylation (eQTM)<sup>64</sup> analyses in  
565 the RICHHS cohort. Transcription was measured via RNA-seq on 194 placentas. The  
566 details of sample collection, assay, and QC for the RNA-seq data are presented in detail  
567 elsewhere<sup>65</sup>, and summarized in the Supplementary Material (Supplementary Methods  
568 File). In this dataset, we identified 6523 unique transcripts annotated to an Ensembl ID  
569 (GrCh37/hg19) and with a transcriptional start site (TSS) within 250 kb upstream or  
570 downstream of 1184 out of the 1224 candidate CpGs. The association between DNAm  
571 and expression levels was assessed via 10295 linear regression models using the MEAL  
572 package<sup>66</sup> in R. We report the results for all models yielding nominally significant  
573 associations (raw p-values <0.05), statistically significant eQTMs were determined at  
574 5% FDR.

### 575 *CpG site annotation*

576 We annotated CpGs to genes and CpG islands with notations from the Illumina  
577 HumanMethylation 450K annotation file, and with several regulatory features using  
578 publicly available data: placental 15-chromatin states<sup>67</sup> released from the ROADMAP  
579 Epigenomics Mapping Consortium<sup>24</sup> (ChromHMM v1.10), placental partially  
580 methylated domains (PMDs)<sup>25</sup> and placental germline differentially methylated regions  
581 (gDRMs)<sup>23</sup>.



## 582 ***Enrichment analyses***

583 Functional enrichment analyses were performed at the gene level via  
584 ConsensusPathDB<sup>68</sup> using KEGG, Reactome, Wikipathways, Biocarta as reference  
585 gene-sets. ConsensusPathDB performs a hypergeometric test and corrects multiple-  
586 testing with FDR. Enrichment for transcription factors and for phenotypes were  
587 assessed at the gene level with EnrichR using ENCODE and ChEA consensus TFs from  
588 ChIP-X database, and dbGaP database, respectively. EnrichR results were ranked using  
589 the combined score (P-value computed using Fisher exact test combined with the z-  
590 score of the deviation from the expected rank).<sup>69</sup> Enrichment for regulatory features was  
591 assessed with the hypergeometric test, and P-values were Bonferroni-corrected for 15  
592 (placental chromatin 15-states) and 6 (relation to CpG island) tests, respectively.

## 593 ***Overlap of MSDP-sensitive CpG sites and birth outcome SNPs***

594 Co-localization between MSDP-associated CpGs in placenta with previously  
595 identified BW, BL, HC and GA SNPs from the largest genome-wide association studies  
596 (GWAS) to date<sup>26-31</sup> was assessed using the GenomicRanges package in R<sup>70</sup>. We  
597 identified which CpGs were located within 1 Mb windows ( $\pm 0.5$  Mb) surrounding each  
598 of the 324 autosomal SNPs, which correspond to 280 potential unique loci. Unique loci  
599 were defined based on the criteria in Warrington et al. 2019<sup>31</sup>, and linkage  
600 disequilibrium in Europeans ( $r^2 > 0.1$  in  $< 2$ Mb).

## 601 ***Association between DNAm and birth outcomes***

602 Within each cohort, robust linear regression models were utilized to test the  
603 association between normalized DNAm beta values at each CpG as the independent  
604 variable and gestational age at birth (inverse normal transformation of sex residuals),  
605 BW z-scores, BL z-scores, and HC z-scores as the dependent variables. Logistic  
606 regression was used to examine the relationships between DNAm and pre-term birth

607 (defined as <37 weeks of gestation). Birth size z-scores were calculated using  
608 international references from the INTERGROWTH-21<sup>st</sup> Project<sup>71</sup> and standardized by  
609 both gestational age and newborn sex. Models were adjusted for maternal age, parity,  
610 maternal education, cohort-specific variables (see Supplemental Methods) and putative  
611 cellular heterogeneity. Inverse variance-weighted fixed-effects meta-analyses<sup>63</sup> were  
612 again used to estimate pooled associations. Multiple testing was controlled with the  
613 Bonferroni adjustment ( $\alpha = 0.05/1224$ ).

#### 614 *Comparison of MSDP-sensitive CpGs in placenta with cord blood*

615 We examined the consistency between MSDP-sensitive CpGs in placenta and in  
616 cord blood<sup>10</sup>. First we compared the coefficients from the models for sustained MSDP  
617 in cord blood, unadjusted for cellular heterogeneity, to results for both any and  
618 sustained MSDP in placenta, adjusted for cellular heterogeneity, using Pearson  
619 correlation coefficients.

620 All DNAm data processing and analyses were conducted in R, with the  
621 exception of the meta-analyses which were performed with METAL.

622

623

624 **References**

- 625 1. Curtin, S. C. & Mathews, T. J. Smoking prevalence and cessation before and  
626 during pregnancy: data from the birth certificate, 2014. *Natl. Vital Stat. Reports*  
627 **65**, (2016).
- 628 2. Smedberg, J., Lupattelli, A., Mårdby, A.-C. & Nordeng, H. Characteristics of  
629 women who continue smoking during pregnancy: a cross-sectional study of  
630 pregnant women and new mothers in 15 European countries. *BMC Pregnancy*  
631 *Childbirth* **14**, (2014).
- 632 3. United States Department of Health and Human Services. The Health  
633 Consequences of Smoking—50 Years of Progress A Report of the Surgeon  
634 General. *A Rep. Surg. Gen.* 1081 (2014). doi:NBK179276
- 635 4. Jauniaux, E. & Burton, G. J. Morphological and biological effects of maternal  
636 exposure to tobacco smoke on the feto-placental unit. *Early Hum. Dev.* **83**, 699–  
637 706 (2007).
- 638 5. Zdravkovic, T., Genbacev, O., McMaster, M. T. & Fisher, S. J. The Adverse  
639 Effects of Maternal Smoking on the Human Placenta: A Review. *Placenta* **26**,  
640 S81–S86 (2005).
- 641 6. Perez-Garcia, V. *et al.* Placentation defects are highly prevalent in embryonic  
642 lethal mouse mutants. *Nature* **555**, 463–468 (2018).
- 643 7. Felix, J. F. & Cecil, C. A. M. Population DNA methylation studies in the  
644 Developmental Origins of Health and Disease (DOHaD) framework. *J. Dev.*  
645 *Orig. Health Dis.* (2018). doi:10.1017/S2040174418000442
- 646 8. Richmond, R. C. & Joubert, B. R. Contrasting the effects of intra-uterine  
647 smoking and one-carbon micronutrient exposures on offspring DNA methylation.  
648 *Epigenomics* **9**, 351–367 (2017).

- 649 9. Felix, J. F. *et al.* Cohort profile: Pregnancy and childhood epigenetics (PACE)  
650 consortium. *Int. J. Epidemiol.* **47**, 22-23u (2018).
- 651 10. Joubert, B. R. *et al.* DNA Methylation in Newborns and Maternal Smoking in  
652 Pregnancy: Genome-wide Consortium Meta-analysis. *Am. J. Hum. Genet.* **98**,  
653 680–696 (2016).
- 654 11. Wilhelm-Benartzi, C. S. *et al.* In Utero Exposures, Infant Growth, and DNA  
655 Methylation of Repetitive Elements and Developmentally Related Genes in  
656 Human Placenta. *Environ. Health Perspect.* **120**, 296–302 (2012).
- 657 12. Chhabra, D. *et al.* Fetal lung and placental methylation is associated with in utero  
658 nicotine exposure. *Epigenetics* **9**, 1473–1484 (2014).
- 659 13. Maccani, J. Z. J., Koestler, D. C., Houseman, E. A., Marsit, C. J. & Kelsey, K. T.  
660 Placental DNA methylation alterations associated with maternal tobacco smoking  
661 at the RUNX3 gene are also associated with gestational age. *Epigenomics* **5**,  
662 619–630 (2013).
- 663 14. Suter, M. *et al.* Maternal tobacco use modestly alters correlated epigenome-wide  
664 placental DNA methylation and gene expression. *Epigenetics* **6**, 1284–1294  
665 (2011).
- 666 15. Morales, E. *et al.* Genome-wide DNA methylation study in human placenta  
667 identifies novel loci associated with maternal smoking during pregnancy. *Int. J.*  
668 *Epidemiol.* **45**, 1644–1655 (2016).
- 669 16. Muggli, E. *et al.* Study protocol: Asking QUestions about Alcohol in pregnancy  
670 (AQUA): A longitudinal cohort study of fetal effects of low to moderate alcohol  
671 exposure. *BMC Pregnancy Childbirth* **14**, (2014).
- 672 17. Heude, B. *et al.* Cohort Profile: The EDEN mother-child cohort on the prenatal  
673 and early postnatal determinants of child health and development. *Int. J.*

- 674            *Epidemiol.* **45**, 353–363 (2016).
- 675    18.    Guillemette, L. *et al.* Genetics of Glucose regulation in Gestation and Growth  
676            (Gen3G): a prospective prebirth cohort of mother–child pairs in Sherbrooke,  
677            Canada. *BMJ Open* **6**, e010031 (2016).
- 678    19.    Guxens, M. *et al.* Cohort Profile: The INMA—Infancia y Medio Ambiente—  
679            (Environment and Childhood) Project. *Int. J. Epidemiol.* **41**, 930–940 (2012).
- 680    20.    Gilbert-diamond, D., Emond, J. A., Baker, E. R., Korrick, S. A. & Karagas, M.  
681            R. Relation between in Utero Arsenic Exposure and Birth Outcomes in a Cohort  
682            of Mothers and Their Newborns from New Hampshire. *Environ. Health*  
683            *Perspect.* **124**, 1299–1307 (2016).
- 684    21.    Appleton, A. A. *et al.* Prenatal Programming of Infant Neurobehaviour in a  
685            Healthy Population. *Paediatr. Perinat. Epidemiol.* **30**, 367–375 (2016).
- 686    22.    Houseman, E. A. *et al.* Reference-free deconvolution of DNA methylation data  
687            and mediation by cell composition effects. *BMC Bioinformatics* **17**, 259 (2016).
- 688    23.    Hamada, H. *et al.* Allele-Specific Methylome and Transcriptome Analysis  
689            Reveals Widespread Imprinting in the Human Placenta. *Am. J. Hum. Genet.* **99**,  
690            1045–1058 (2016).
- 691    24.    Roadmap Epigenomics Consortium *et al.* Integrative analysis of 111 reference  
692            human epigenomes. *Nature* **518**, 317–329 (2015).
- 693    25.    Schroeder, D. I. *et al.* The human placenta methylome. *Proc. Natl. Acad. Sci.*  
694            **110**, 6037–6042 (2013).
- 695    26.    Horikoshi, M. *et al.* Genome-wide associations for birth weight and correlations  
696            with adult disease. *Nature* **538**, 248–252 (2016).
- 697    27.    Beaumont, R. N. *et al.* Genome-wide association study of offspring birth weight  
698            in 86 577 women identifies five novel loci and highlights maternal genetic

- 699 effects that are independent of fetal genetics. *Hum. Mol. Genet.* **27**, 742–756  
700 (2018).
- 701 28. van der Valk, R. J. P. *et al.* A novel common variant in DCST2 is associated with  
702 length in early life and height in adulthood. *Hum. Mol. Genet.* **24**, 1155–1168  
703 (2015).
- 704 29. Taal, H. *et al.* Common variants at 12q15 and 12q24 are associated with infant  
705 head circumference. *Nat. Genet.* **44**, 532–538 (2012).
- 706 30. Zhang, G. *et al.* Genetic Associations with Gestational Duration and Spontaneous  
707 Preterm Birth. *N. Engl. J. Med.* **377**, 1156–1167 (2017).
- 708 31. Warrington, N. M. *et al.* Maternal and fetal genetic effects on birth weight and  
709 their relevance to cardio-metabolic risk factors. *Nat. Genet.* **51**, 804–814 (2019).
- 710 32. Do, C. *et al.* Mechanisms and Disease Associations of Haplotype-Dependent  
711 Allele-Specific DNA Methylation. *Am. J. Hum. Genet.* **98**, 934–955 (2016).
- 712 33. Delahaye, F. *et al.* Genetic variants influence on the placenta regulatory  
713 landscape. *PLOS Comput. Biol.* **14**, e1007785 (2018).
- 714 34. Joehanes, R. *et al.* Epigenetic Signatures of Cigarette Smoking. *Circ Cardiovasc*  
715 *Genet* **9**, 436–447 (2016).
- 716 35. Mook-Kanamori, D. O. *et al.* Variants near CCNL1/LEKR1 and in ADCY5 and  
717 fetal growth characteristics in different trimesters. *J. Clin. Endocrinol. Metab.* **96**,  
718 E810-5 (2011).
- 719 36. Urbanek, M. *et al.* The chromosome 3q25 genomic region is associated with  
720 measures of adiposity in newborns in a multi-ethnic genome-wide association  
721 study. *Hum. Mol. Genet.* **22**, 3583–96 (2013).
- 722 37. Hivert, M.-F. *et al.* Genetic determinants of adiponectin regulation revealed by  
723 pregnancy. *Obesity* **25**, 935–944 (2017).

- 724 38. Andersson, E. A. *et al.* The Birth Weight Lowering C-Allele of rs900400 Near  
725 LEKR1 and CCNL1 Associates with Elevated Insulin Release following an Oral  
726 Glucose Challenge. *PLoS One* **6**, e27096 (2011).
- 727 39. Li, C. *et al.* Genome-Wide Association Study Meta-Analysis of Long-Term  
728 Average Blood Pressure in East Asians. *Circ. Cardiovasc. Genet.* **10**, e001527  
729 (2017).
- 730 40. Daoud, G., Le bellego, F. & Lafond, J. PP2 regulates human trophoblast cells  
731 differentiation by activating p38 and ERK1/2 and inhibiting FAK activation.  
732 *Placenta* **29**, 862–70 (2008).
- 733 41. Kim, S.-M., Kang, J.-O., Lim, J. E., Hwang, S.-Y. & Oh, B. Csk Regulates Blood  
734 Pressure by Controlling the Synthetic Pathways of Aldosterone. *Circ. J.* **82**, 168–  
735 175 (2018).
- 736 42. Chan, M. C. *et al.* Tuning the transcriptional response to hypoxia by inhibiting  
737 Hypoxia-inducible Factor (HIF) prolyl and asparaginyl hydroxylases. *J. Biol.*  
738 *Chem.* **291**, 20661–20673 (2016).
- 739 43. Chen, D.-B. & Zheng, J. Regulation of Placental Angiogenesis. *Microcirculation*  
740 **21**, 15–25 (2014).
- 741 44. Sahay, A. S., Sundrani, D. P. & Joshi, S. R. Neurotrophins: Role in Placental  
742 Growth and Development. *Vitam. Horm.* **104**, 243–261 (2017).
- 743 45. Paul, S., Home, P., Bhattacharya, B. & Ray, S. GATA factors: Master regulators  
744 of gene expression in trophoblast progenitors. *Placenta* **60**, S61–S66 (2017).
- 745 46. Bai, Q. *et al.* Dissecting the First Transcriptional Divergence During Human  
746 Embryonic Development. *Stem Cell Rev.* **8**, 150–162 (2012).
- 747 47. Ma, G. T. *et al.* GATA-2 and GATA-3 regulate trophoblast-specific gene  
748 expression in vivo. *Development* **124**, 907–14 (1997).

- 749 48. Dior, U. P. *et al.* Parental smoking during pregnancy and offspring cardio-  
750 metabolic risk factors at ages 17 and 32. *Atherosclerosis* **235**, 430–7 (2014).
- 751 49. Behl, M. *et al.* Evaluation of the Association between Maternal Smoking,  
752 Childhood Obesity, and Metabolic Disorders: A National Toxicology Program  
753 Workshop Review. *Environ. Health Perspect.* **121**, 170–180 (2012).
- 754 50. Stančáková, A. & Laakso, M. Genetics of metabolic syndrome. *Rev. Endocr.*  
755 *Metab. Disord.* **15**, 243–252 (2014).
- 756 51. Zacharasiewicz, A. Maternal smoking in pregnancy and its influence on  
757 childhood asthma. *ERJ Open Res.* **2**, 00042–02016 (2016).
- 758 52. Dogan, M. V., Beach, S. R. H. & Philibert, R. A. Genetically contextual effects  
759 of smoking on genome wide DNA methylation. *Am. J. Med. Genet. Part B*  
760 *Neuropsychiatr. Genet.* (2017). doi:10.1002/ajmg.b.32565
- 761 53. Gao, X., Thomsen, H., Zhang, Y., Breitling, L. P. & Brenner, H. The impact of  
762 methylation quantitative trait loci (mQTLs) on active smoking-related DNA  
763 methylation changes. *Clin. Epigenetics* **9**, 1–13 (2017).
- 764 54. Tsai, P., Glastonbury, C. A., Eliot, M. N. & Bollepalli, S. Smoking induces  
765 coordinated DNA methylation and gene expression changes in adipose tissue  
766 with consequences for metabolic health. *bioRxiv Genomics* 1–21 (2018).  
767 doi:10.1101/353581
- 768 55. Joubert, B. R. *et al.* Maternal smoking and DNA methylation in newborns: In  
769 utero effect or epigenetic inheritance? *Cancer Epidemiol. Biomarkers Prev.* **23**,  
770 1007–1017 (2014).
- 771 56. Wang, Y. & Zhao, S. Cell Types of the Placenta. (2010).
- 772 57. Fogarty, N. M. E., Burton, G. J. & Ferguson-Smith, A. C. Different epigenetic  
773 states define syncytiotrophoblast and cytotrophoblast nuclei in the trophoblast of



- 774 the human placenta. *Placenta* **36**, 796–802 (2015).
- 775 58. Fortin, J.-P. *et al.* Functional normalization of 450k methylation array data  
776 improves replication in large cancer studies. *Genome Biol.* **15**, 503 (2014).
- 777 59. Teschendorff, A. E. *et al.* A beta-mixture quantile normalization method for  
778 correcting probe design bias in Illumina Infinium 450 k DNA methylation data.  
779 *Bioinformatics* **29**, 189–196 (2013).
- 780 60. Chen, J. *et al.* CpGFilter: model-based CpG probe filtering with replicates for  
781 epigenome-wide association studies. *Bioinformatics* **32**, 469–471 (2016).
- 782 61. Houseman, E. A., Molitor, J. & Marsit, C. J. Reference-free cell mixture  
783 adjustments in analysis of DNA methylation data. *Bioinformatics* **30**, 1431–1439  
784 (2014).
- 785 62. Venables, W. N. & Ripley, B. D. *Modern Applied Statistics with S.* (Springer,  
786 2002).
- 787 63. Willer, C. J., Li, Y. & Abecasis, G. R. METAL: fast and efficient meta-analysis  
788 of genomewide association scans. *Bioinformatics* **26**, 2190–2191 (2010).
- 789 64. Teschendorff, A. E. & Relton, C. L. Statistical and integrative system-level  
790 analysis of DNA methylation data. *Nat. Rev. Genet.* **Nov 13**, (2017).
- 791 65. Deysenroth, M. A. *et al.* Whole-transcriptome analysis delineates the human  
792 placenta gene network and its associations with fetal growth. *BMC Genomics* **18**,  
793 (2017).
- 794 66. Ruiz-Arenas, C. & Gonzalez, J. MEAL: Perform methylation analysis. *R Packag.*  
795 *version 1.10.1* (2018).
- 796 67. Ernst, J. & Kellis, M. ChromHMM: automating chromatin-state discovery and  
797 characterization. *Nat. Methods* **9**, 215–6 (2012).
- 798 68. Kamburov, A. *et al.* ConsensusPathDB: Toward a more complete picture of cell

- 799 biology. *Nucleic Acids Res.* **39**, 712–717 (2011).
- 800 69. Chen, E. Y. *et al.* Enrichr: interactive and collaborative HTML5 gene list  
801 enrichment analysis tool. *BMC Bioinformatics* **14**, (2013).
- 802 70. Lawrence, M. *et al.* Software for Computing and Annotating Genomic Ranges.  
803 *PLOS Comput. Biol.* **9**, e1003118 (2013).
- 804 71. Villar, J. *et al.* International standards for newborn weight, length, and head  
805 circumference by gestational age and sex: The Newborn Cross-Sectional Study  
806 of the INTERGROWTH-21st Project. *Lancet* **384**, 857–868 (2014)

### 807 **Acknowledgements**

808 We would like to thank all the families that participated in these studies for their  
809 generous contribution. Detailed acknowledgements and funding can be found in  
810 Supplementary Material.

811

### 812 **Author contributions**

813 TME, MVU, CJM, JL, MFH and MB conceived of and designed the study. Study-  
814 specific analyses were completed by JMC, (AQUA), ES (EDEN), AC (Gen3G), PCS  
815 and JMM (GENEIDA), MVU (INMA) and TME (NHBCS and RICHS). MV meta-  
816 analysed these results. TME, MV and MB performed the follow-up analyses. TME,  
817 MVU, JS, CJM, MFH, and MB interpreted the results. TME, MVU, and MB wrote the  
818 first draft of the manuscript. All authors (TME, MVU, ES, AC, ML, JMC, CL, ERB,  
819 NFJ, BH, PP, BGA, JH, MAD, MRK, CI, LB, PCS, YJL, KH, TB, MAC, JMM, EM,  
820 JC, MFF, JT, AGM, SJL, JS, CJM, JL, MFH, MB) read and critically revised drafts of  
821 the manuscript. Correspondence can be addressed to TME  
822 (Todd.M.Everson@Emory.edu) and MB (mariona.bustamante@isglobal.org).

823

824  
825

26 Table 1: Distribution of any and sustained MSDP within participating cohorts.

| Cohort       | Country   | Any MSDP    |                      |                     | Sustained MSDP |                     |                     |
|--------------|-----------|-------------|----------------------|---------------------|----------------|---------------------|---------------------|
|              |           | Total N     | N (%) Non-smokers    | N (%) Smokers       | Total N        | N (%) Non-smokers   | N (%) Smokers       |
| AQUA         | Australia | 99          | 75 (75.76%)          | 24 (24.24%)         | -              | -                   | -                   |
| EDEN         | France    | 647         | 446 (68.93%)         | 201 (31.07%)        | 570            | 446 (68.93%)        | 124 (21.75%)        |
| Gen3G        | Canada    | 151         | 138 (91.39%)         | 13 (8.61%)          | -              | -                   | -                   |
| GENEID A     | Spain     | 87          | 67 (77.01%)          | 20 (22.99%)         | 82             | 67 (77.01%)         | 15 (18.29%)         |
| INMA         | Spain     | 166         | 119 (71.69%)         | 47 (28.31%)         | 143            | 119 (71.69%)        | 24 (16.78%)         |
| NHBCS        | USA       | 310         | 290 (93.55%)         | 20 (6.45%)          | -              | -                   | -                   |
| RICHS        | USA       | 240         | 221 (92.08%)         | 19 (7.92%)          | -              | -                   | -                   |
| <b>TOTAL</b> |           | <b>1700</b> | <b>1356 (79.76%)</b> | <b>344 (20.24%)</b> | <b>795</b>     | <b>632 (79.50%)</b> | <b>163 (20.50%)</b> |

27 MSDP = Maternal smoking during pregnancy.

28

29

30 Table 2. Meta-analysis results from models of any and sustained MSDP, for the 20 CpGs with the smallest  
 31 p-values for the model of any MSDP, and the percent increase in effect size between sustained and any  
 32 MSDP (% Change); all models adjusted for maternal age, parity, education and putative cellular  
 33 heterogeneity; CpGs that were not annotated with a gene name in the Illumina 450K annotation file have  
 34 been annotated with their genomic region (ie. 4q12).

| CpG Annotations |                 |                         | Any MSDP  |       |           | Sustained MSDP |       |           | % Change |
|-----------------|-----------------|-------------------------|-----------|-------|-----------|----------------|-------|-----------|----------|
| CpG ID          | Location        | Annotated Gene (Region) | $\beta_1$ | S.E.  | P-value   | $\beta_1$      | S.E.  | P-value   |          |
| cg17823829      | chr1:202765754  | <i>KDM5B</i> (Body)     | 0.06      | 0.006 | 1.79E-22  | 0.086          | 0.008 | 3.80E-27  | 42.98    |
| cg26045080      | chr1:36807363   | <i>STK40</i> (Body)     | 0.024     | 0.003 | 6.66E-19  | 0.032          | 0.003 | 4.86E-21  | 31.12    |
| cg00534380      | chr2:101766586  | <i>TBC1D8</i> (Body)    | -0.044    | 0.004 | 2.53E-25  | -0.061         | 0.006 | 1.03E-28  | 38.46    |
| cg19246018      | chr2:240031588  | <i>HDAC4</i> (Body)     | 0.015     | 0.002 | 1.39E-20  | 0.016          | 0.002 | 6.52E-20  | 8.28     |
| cg23752985      | chr2:85803571   | <i>VAMP8</i> (TSS1500)  | -0.019    | 0.002 | 1.31E-19  | -0.025         | 0.003 | 3.77E-16  | 32.98    |
| cg00666842      | chr2:88366145   | <i>SMYD1</i> (TSS1500)  | 0.033     | 0.003 | 1.17E-22  | 0.049          | 0.004 | 2.23E-34  | 48.17    |
| cg27402634      | chr3:156536860  | 3q25.31                 | -0.23     | 0.01  | 5.40E-119 | -0.258         | 0.009 | 7.20E-181 | 12.33    |
| cg09491670      | chr4:53529646   | 4q12                    | 0.016     | 0.002 | 1.60E-19  | 0.023          | 0.002 | 3.96E-29  | 43.31    |
| cg25585967      | chr5:14452105   | <i>TRIO</i> (Body)      | 0.04      | 0.005 | 7.53E-19  | 0.061          | 0.006 | 2.16E-23  | 51.74    |
| cg12291408      | chr7:100037572  | 7q22.1                  | -0.036    | 0.004 | 1.43E-18  | -0.052         | 0.005 | 2.34E-22  | 45.15    |
| cg14214914      | chr9:131870304  | <i>CRAT</i> (Body)      | 0.036     | 0.004 | 1.57E-20  | 0.05           | 0.005 | 1.20E-26  | 41.29    |
| cg20340720      | chr10:104512523 | <i>WBPI1</i> (Body)     | -0.054    | 0.004 | 5.38E-42  | -0.076         | 0.005 | 2.19E-58  | 40.52    |
| cg26648103      | chr11:66791718  | <i>SYT12</i> (5'UTR)    | -0.033    | 0.004 | 8.98E-21  | -0.043         | 0.005 | 4.30E-20  | 30.51    |
| cg26115089      | chr11:93846406  | <i>HEPHL1</i> (3'UTR)   | 0.025     | 0.002 | 1.33E-28  | 0.032          | 0.003 | 2.00E-27  | 24.8     |
| cg26843110      | chr15:74935742  | <i>EDC3</i> (Body)      | -0.056    | 0.005 | 1.74E-29  | -0.082         | 0.007 | 1.74E-36  | 47.84    |
| cg26433445      | chr16:81764289  | 16q23.3                 | 0.024     | 0.003 | 5.85E-20  | 0.034          | 0.003 | 1.34E-23  | 40.25    |
| cg24177452      | chr17:27494295  | <i>MYO18A</i> (5'UTR)   | 0.025     | 0.003 | 3.40E-18  | 0.031          | 0.004 | 2.84E-18  | 27.35    |
| cg06716730      | chr17:35851459  | <i>DUSP14</i> (5'UTR)   | -0.022    | 0.003 | 1.40E-18  | -0.032         | 0.003 | 4.47E-22  | 46.79    |
| cg03313447      | chr19:41829042  | <i>CCDC97</i> (3'UTR)   | -0.02     | 0.002 | 1.26E-22  | -0.029         | 0.002 | 1.93E-34  | 45.73    |
| cg02341503      | chr20:45947123  | <i>ZMYND8</i> (Body)    | -0.02     | 0.002 | 1.81E-18  | -0.025         | 0.003 | 4.83E-18  | 25.74    |

35  $\beta_1$  = Coefficient of the association between DNAm and MSDP; MSDP = Maternal smoking during  
 36 pregnancy; S.E. = Standard Error.  
 37  
 38

39 Table 3. Results from eQTM models, DNAm versus gestational age at birth, and DNAm versus BW Z-score  
 40 models that yielded at least nominally significant associations, among the 20 CpGs that yielded the most  
 41 statistically significant associations with any MSDP in the primary meta-analysis (sorted in the same order  
 42 as Table 2).

| CpG ID     | Annotate<br>d Gene | eQTM          |           |      |          | Gestational Duration |      |          | BW Z-score |      |          |
|------------|--------------------|---------------|-----------|------|----------|----------------------|------|----------|------------|------|----------|
|            |                    | eQTM<br>Gene  | $\beta_1$ | S.E. | P-value  | $\beta_1$            | S.E. | P-value  | $\beta_1$  | S.E. | P-value  |
| cg17823829 | <i>KDM5B</i>       | <i>PPFIA4</i> | -2.53     | 0.7  | 4.05E-04 | -                    | 0.2  | 9.12E-06 | -          | 0.2  | 9.72E-05 |
| cg26045080 | <i>STK40</i>       | <i>SH3D21</i> | -4.26     | 0.7  | 8.34E-08 | -                    | 0.4  | 4.19E-03 | -          | -    | -        |
| cg00534380 | <i>TBC1D8</i>      | <i>TBC1D8</i> | -2.29     | 0.5  | 1.13E-05 | 3.53                 | 0.3  | 9.26E-09 | 1.48       | 0.3  | 1.62E-04 |
| cg19246018 | <i>HDAC4</i>       | -             | -         | -    | -        | -                    | 0.5  | 1.74E-02 | -          | -    | -        |
| cg23752985 | <i>VAMP8</i>       | <i>CAPG</i>   | 6.33      | 1.7  | 3.96E-04 | 5.47                 | 0.6  | 1.40E-09 | -          | -    | -        |
| cg00666842 | <i>SMYD1</i>       | -             | -         | -    | -        | -                    | -    | -        | -          | -    | -        |
| cg27402634 | 3q25.31            | <i>LEKR1</i>  | -2.32     | 0.6  | 7.14E-04 | -                    | -    | -        | 0.92       | 0.1  | 6.71E-07 |
| cg09491670 | 4q12               | <i>USP46</i>  | -3.59     | -    | 4.91E-04 | -                    | -    | -        | -          | -    | -        |
| cg25585967 | <i>TRIO</i>        | -             | -         | -    | -        | -                    | 0.3  | 8.64E-03 | -          | 0.3  | 2.06E-04 |
| cg12291408 | 7q22.1             | <i>ACTL6B</i> | -4.89     | -    | 1.12E-02 | -                    | -    | -        | 1.31       | 0.3  | 6.82E-04 |
| cg14214914 | <i>CRAT</i>        | <i>CRAT</i>   | -4.76     | 0.5  | 6.03E-09 | 0.96                 | 0.3  | 1.35E-02 | -          | -    | -        |
| cg20340720 | <i>WBP1L</i>       | -             | -         | -    | -        | -                    | -    | -        | 1.86       | 0.3  | 2.42E-07 |
| cg26648103 | <i>SYT12</i>       | -             | -         | -    | -        | 1.06                 | 0.4  | 1.29E-02 | 1.66       | 0.4  | 7.56E-05 |
| cg26115089 | <i>HEPHL1</i>      | -             | -         | -    | -        | -1.1                 | 0.5  | 4.43E-02 | -          | 0.5  | 6.71E-03 |
| cg26843110 | <i>EDC3</i>        | <i>CSK</i>    | 0.57      | 0.2  | 2.18E-05 | 2.3                  | 0.3  | 5.09E-03 | 1.28       | 0.3  | 1.19E-04 |
| cg26433445 | 16q23.3            | -             | -         | -    | -        | -                    | -    | -        | 2.99       | 0.6  | 9.06E-07 |
| cg24177452 | <i>MYO18A</i>      | <i>MYO18</i>  | -1.37     | 0.4  | 1.79E-03 | -                    | -    | -        | -          | -    | -        |
| cg06716730 | <i>DUSP14</i>      | <i>DUSP14</i> | -3.07     | 0.9  | 1.59E-03 | 3.72                 | 0.5  | 7.87E-04 | -          | -    | -        |
| cg03313447 | <i>CCDC97</i>      | <i>TGFB1</i>  | -         | 1.4  | 7.27E-13 | -                    | 0.7  | 7.79E-04 | 2.29       | 0.7  | 1.58E-03 |
| cg02341503 | <i>ZMYND8</i>      | <i>ZMYND8</i> | -1.72     | 0.6  | 7.37E-03 | 1.44                 | 0.6  | 2.29E-02 | 3.19       | 0.6  | 2.70E-07 |

13  $\beta_1$  = Coefficient of the association between DNAm and the outcome variable (mRNA expression,  
 14 Gestational duration, or BW Z-score); BW = Birth weight; S.E. = Standard Error.  
 15  
 16  
 17

18 Table 4: Differentially methylated CpGs with MSDP in placenta (from our meta-analysis) and cord blood  
 19 (from a published PACE meta-analysis<sup>10</sup>) that yielded Bonferroni-significant associations in both tissues.

| CpG Annotation |                         | Cord blood*<br>(Sustained MSDP) |       |           | Placenta<br>(Sustained MSDP) |       |          | Placenta<br>(Any MSDP) |       |          |
|----------------|-------------------------|---------------------------------|-------|-----------|------------------------------|-------|----------|------------------------|-------|----------|
| CpG ID         | Gene                    | $\beta_1$                       | S.E.  | P-value   | $\beta_1$                    | S.E.  | P-value  | $\beta_1$              | S.E.  | P-value  |
| cg25189904     | <i>GNGL2</i> (TSS1500)  | -0.024                          | 0.002 | 1.38E-32  | -0.020                       | 0.003 | 2.54E-13 | -0.014                 | 0.002 | 1.99E-10 |
| cg05575921     | <i>AHRR</i> (Body)      | -0.064                          | 0.002 | 1.64E-193 | -0.030                       | 0.005 | 5.01E-09 | -0.015                 | 0.004 | 1.83E-04 |
| cg21161138     | <i>AHRR</i> (Body)      | -0.022                          | 0.001 | 1.78E-54  | -0.026                       | 0.004 | 5.25E-11 | -0.018                 | 0.003 | 2.55E-10 |
| cg08327744     | <i>RNF122</i> (Body)    | -0.010                          | 0.002 | 1.37E-08  | 0.020                        | 0.003 | 3.12E-09 | 0.016                  | 0.003 | 2.21E-09 |
| cg15893360     | <i>PXN</i> (Body)       | -0.011                          | 0.002 | 1.66E-08  | -0.024                       | 0.004 | 3.61E-08 | -0.015                 | 0.003 | 3.43E-06 |
| cg12101586     | <i>CYP1A1</i> (TSS1500) | 0.045                           | 0.003 | 3.67E-50  | -0.045                       | 0.008 | 7.15E-08 | -0.026                 | 0.006 | 9.12E-06 |
| cg23680900     | <i>CYP1A1</i> (TSS200)  | 0.003                           | 0.001 | 8.73E-08  | -0.018                       | 0.002 | 6.26E-21 | -0.006                 | 0.001 | 7.35E-06 |
| cg07565956     | <i>ZBTB4</i> (5'UTR)    | -0.006                          | 0.001 | 2.50E-10  | -0.023                       | 0.003 | 4.02E-18 | -0.016                 | 0.002 | 2.26E-16 |
| cg16547579     | <i>SLC23A2</i> (5'UTR)  | -0.013                          | 0.002 | 2.00E-10  | -0.048                       | 0.009 | 1.47E-08 | -0.031                 | 0.007 | 1.42E-06 |

50  $\beta_1$  = Coefficient of the association between DNAm and MSDP; MSDP = Maternal smoking during  
 51 pregnancy; S.E. = Standard Error

52 \* Main model in Joubert et al: sustained MSDP adjusted for cell type heterogeneity

53

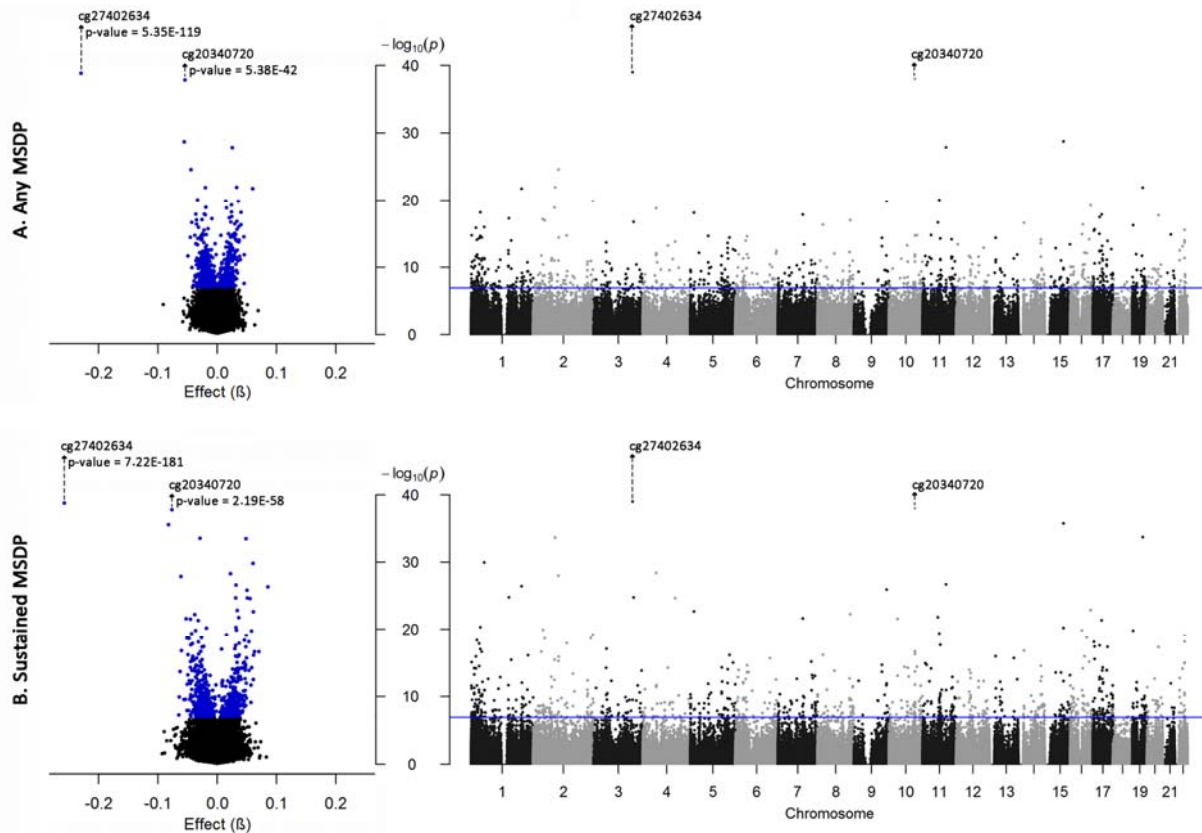

54

55

56

57

58

59

60

61

62

63

64

65

66

**Figure 1.** Volcano and Manhattan plots of the association between any MSDP (total N=1700, exposed = 344) (A) and sustained MSDP (total N=795, exposed = 163) (B) with placental DNAm adjusted for maternal age, parity, maternal education and putative cellular heterogeneity. In the volcano plots, the x-axis shows the difference in DNAm (effect) with a possible range between 0 and 1, while the x-axis in the Manhattan plot represents genomic location; both plots share the same y-axis with  $-\log_{10}(P)$ . Bonferroni thresholds for statistical significance are shown as blue dots and a blue horizontal line, for volcano and Manhattan plots, respectively. The y-axes were truncated to a minimum p-value of  $1 \times 10^{-40}$  (or maximum  $-\log_{10}(P)$  of 40), to allow for better visualization of the majority of our results. The CpGs that were impacted by y-axis truncation are indicated with arrows and annotated with their actual p-values.



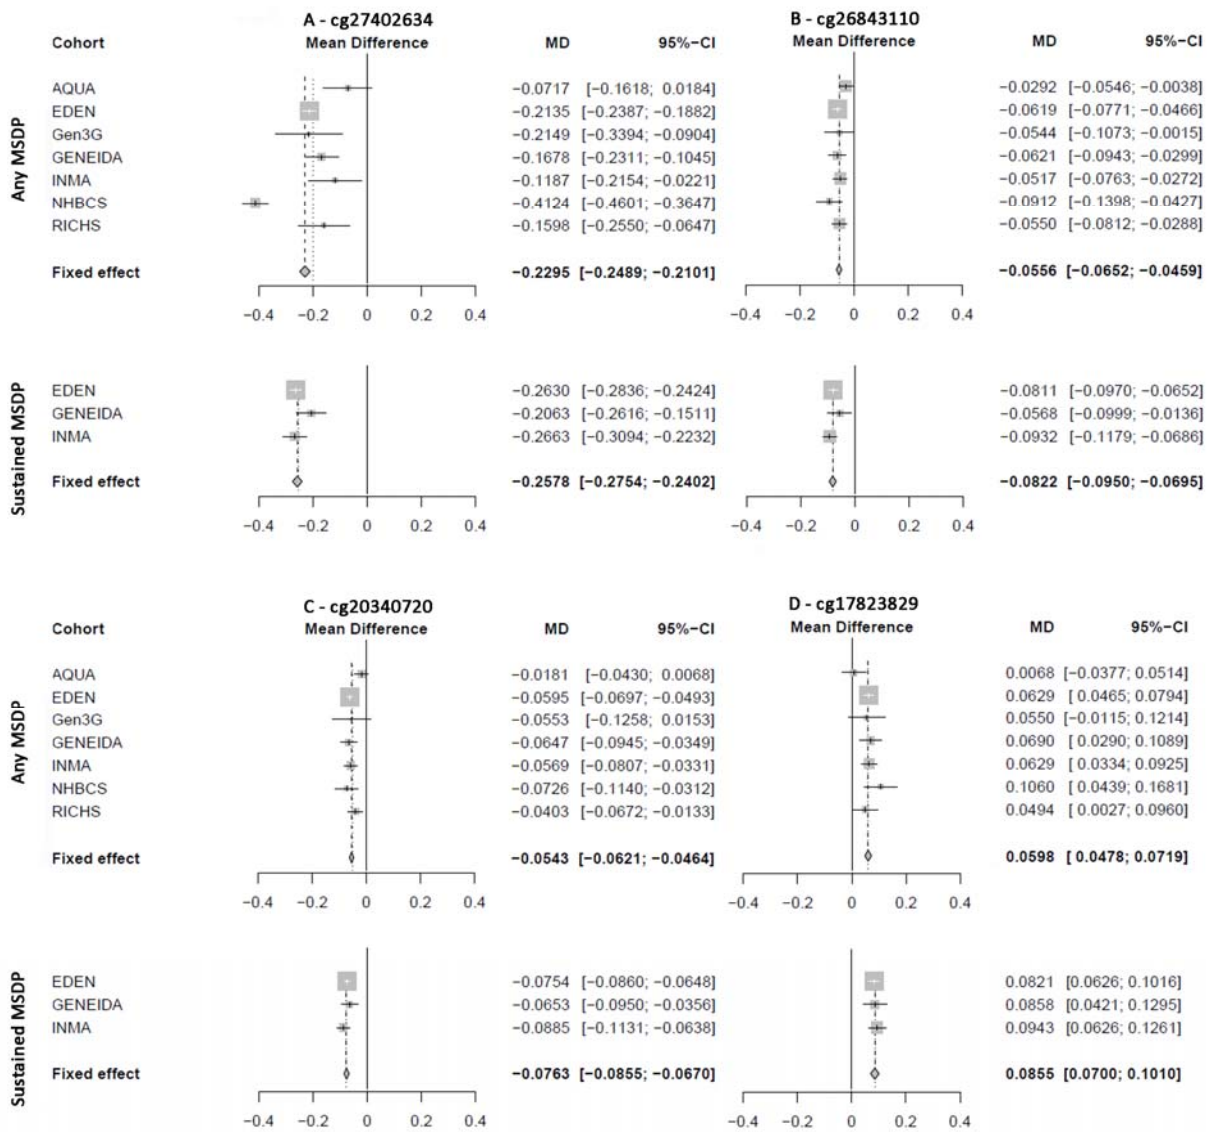

57  
58 **Figure 2.** Forest plots of the cohort specific estimates of association and fixed-effect meta-analysis estimates  
59 of association between placental DNAm levels at (A) cg27402634, (B) cg26843110, (C) cg20340720, and  
60 (D) cg17823829 with any MSDP and sustained MSDP; models adjusted for maternal age, parity, maternal  
61 education, and putative cellular heterogeneity.  
62  
63  
64  
65  
66

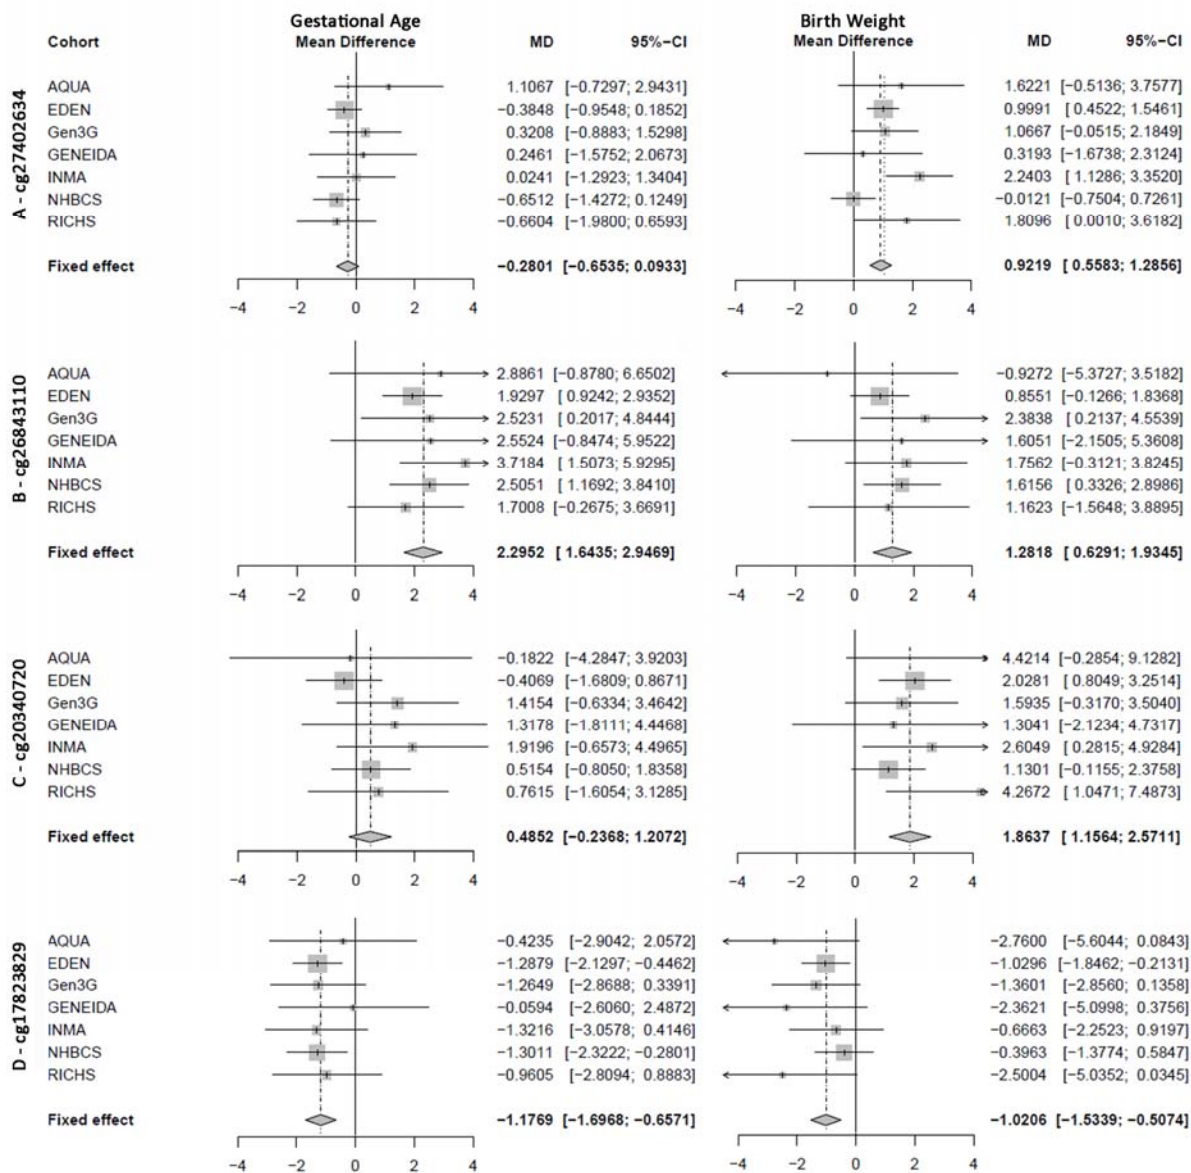

77  
78 **Figure 3.** Forest plots of the cohort specific estimates of association and fixed-effect meta-analysis estimates  
79 of association between higher levels of placental DNAm at (A) cg27402634, (B) cg26843110, (C)  
30 cg20340720, and (D) cg17823829 with gestational age and birth weight z-scores; models adjusted for  
31 maternal age, parity, maternal education, and putative cellular heterogeneity.  
32  
33  
34  
35

36

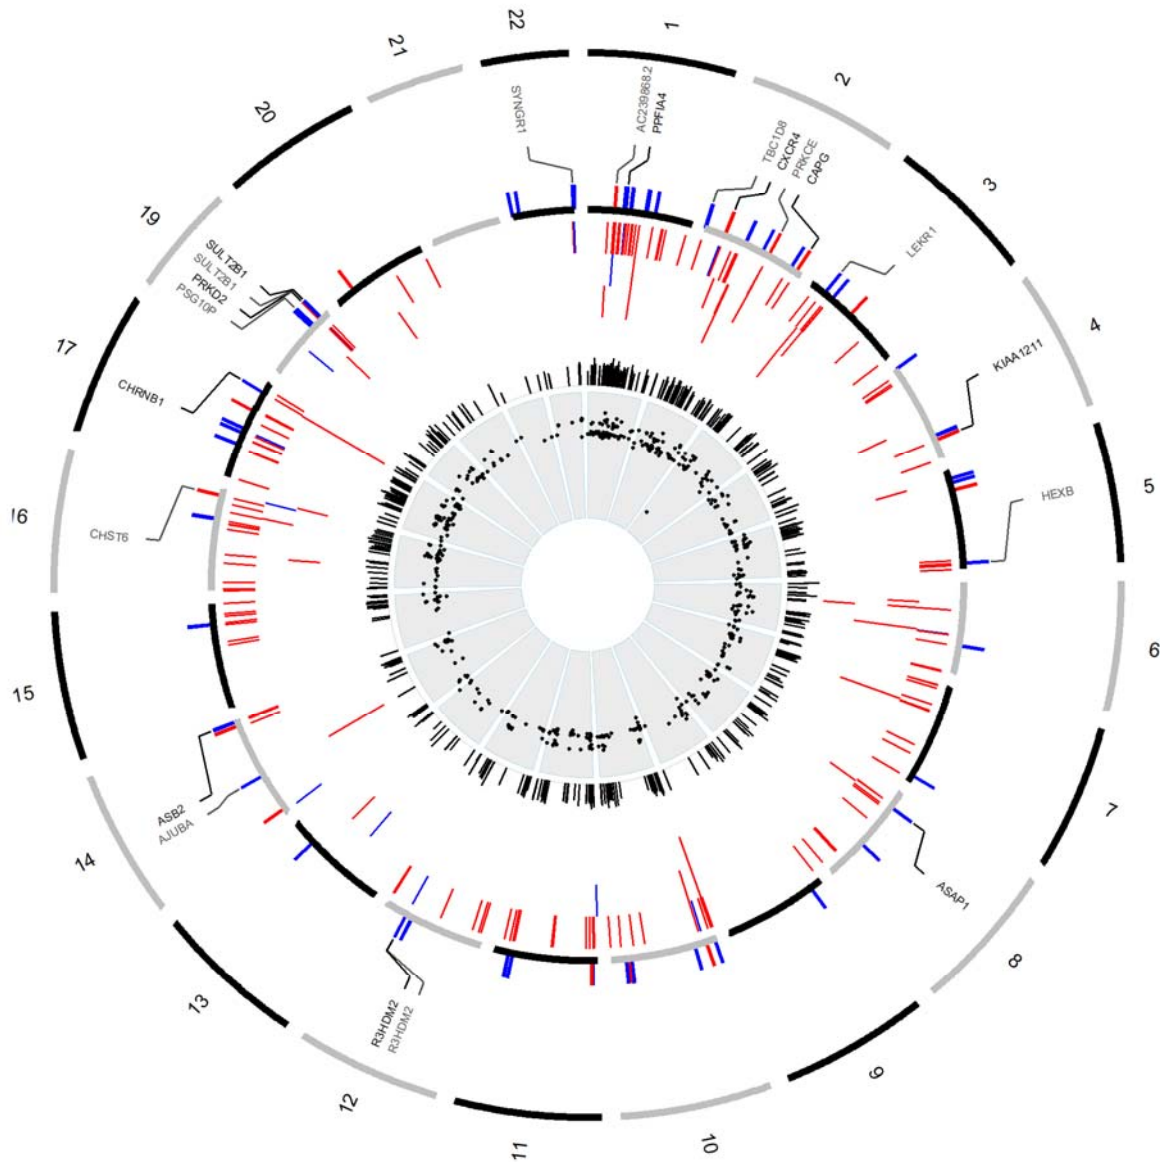

37

38 **Figure 4.** Circos plot summarizing all analyses for the 548 CpG sites that yielded Bonferroni-significant  
39 associations with both any and sustained MSDP. From inner to outer-band: Black points = differential  
40 DNAm between any- and no MSDP; Black Bars = percent increase in magnitude of association when  
41 comparing results from any MSDP to sustained MSDP; Color Bars = Positive (red) or Inverse (blue)  
42 associations between DNAm and HC, BL, BW, and GA, that yielded Bonferroni-significant associations;  
43 Color Bars = Positive (red) or Inverse (blue) associations between DNAm and nearby gene expression, that  
44 yielded an association at a 5% FDR; Names of eQTM genes were annotated to the outer band for CpGs that  
45 yielded an association between DNAm and expression with a 5% FDR and yielded an association between  
46 DNAm and at least one birth outcome after Bonferroni-adjustment.

37

38

39

40
